# Supplementary material
Source: HighWire-hosted journal article supplement (http://www.jneurosci.org/highwire/filestream/598519/field_highwire_adjunct_files/4/Weigelt_SupplTable1.pdf)
Supplement: Weigelt_SupplTable1.pdf [file Weigelt_SupplTable1.pdf]

**Supplementary Table 1. Additional statistical analysis for Experiment 1**

| Left Hemisphere  |             |             |          |             |          |
|------------------|-------------|-------------|----------|-------------|----------|
| No.              | ROI         | Conex < Nov |          | Revex < Nov |          |
|                  |             | <i>p</i>    | <i>t</i> | <i>p</i>    | <i>t</i> |
| 1                | LOC         | .45         | 0.76     | .23         | 1.21     |
| 2                | IOG         | .33         | 0.97     | .37         | 0.90     |
| 3                | LOS         | .96         | -0.06    | .98         | -0.03    |
| 4                | LOS/TOS     | .64         | -0.47    | .41         | -0.83    |
| 5                | TOS         | .27         | 1.11     | .99         | 0.02     |
| 6                | POS         | .62         | 0.50     | .94         | -0.08    |
|                  | Insula      |             |          |             |          |
| 7                | - inferior  | .00*        | 5.47     | .02*        | 2.51     |
| 8                | - superior  | .00*        | 4.96     | .37         | 0.90     |
| Right Hemisphere |             |             |          |             |          |
| No.              | ROI         | Conex < Nov |          | Revex < Nov |          |
|                  |             | <i>p</i>    | <i>t</i> | <i>p</i>    | <i>t</i> |
|                  | LOC         |             |          |             |          |
| 9                | - anterior  | .06         | 1.92     | .61         | 0.52     |
| 10               | - posterior | .78         | -0.37    | .66         | -0.45    |
|                  | IOG         |             |          |             |          |
| 11               | - posterior | .70         | 0.39     | .85         | -0.14    |
| 12               | - anterior  | .88         | -0.15    | .72         | -0.36    |
| 13               | LOS/TOS     | .53         | 0.62     | .69         | 0.40     |
| 14               | POS         | .99         | -0.01    | .48         | -0.71    |
|                  | Insula      |             |          |             |          |
| 15               | - inferior  | .00*        | 5.22     | .13         | 1.52     |
| 16               | - superior  | .00*        | 4.06     | .44         | 0.78     |
| 17               | VLPFC       | .01*        | 2.70     | .03*        | 2.14     |

Additional statistical values for Experiment 1 for different pairwise comparisons that were computed on pre-defined ROIs (ROI defining contrast rep < nov) and Talairach coordinates of the center of the ROI. Talairach conventions: x – left to right, y – back to front, z – bottom to top, \*  $p < .05$ . See also Fig. 2 and the results section ‘Experiment 1’.
